# Supplementary material
Source: PubMed Central journal article supplement (PMC4622063)

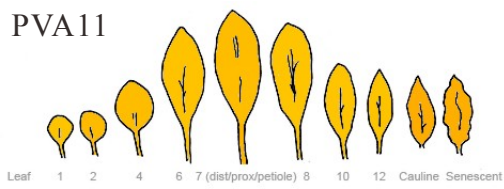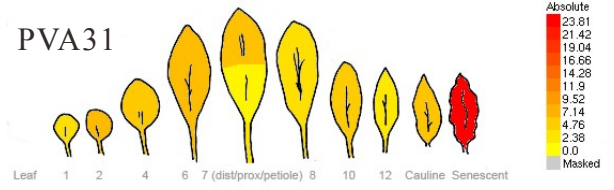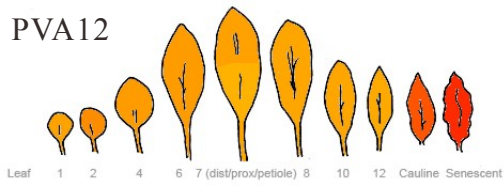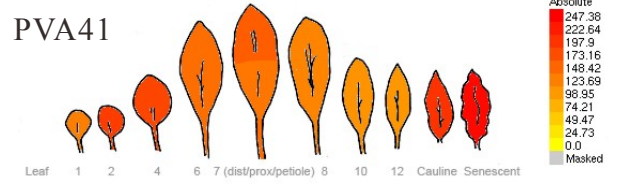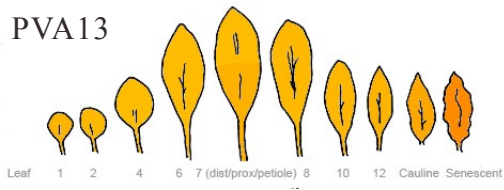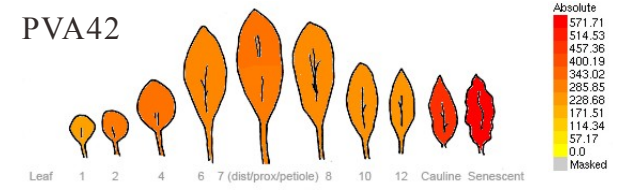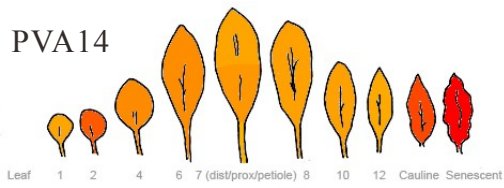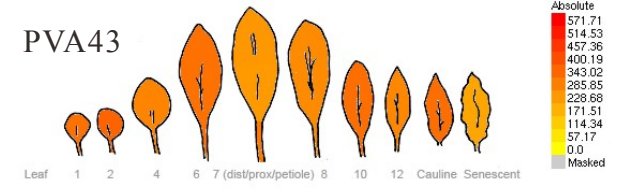

Fig. S1 Nakai et al.

A

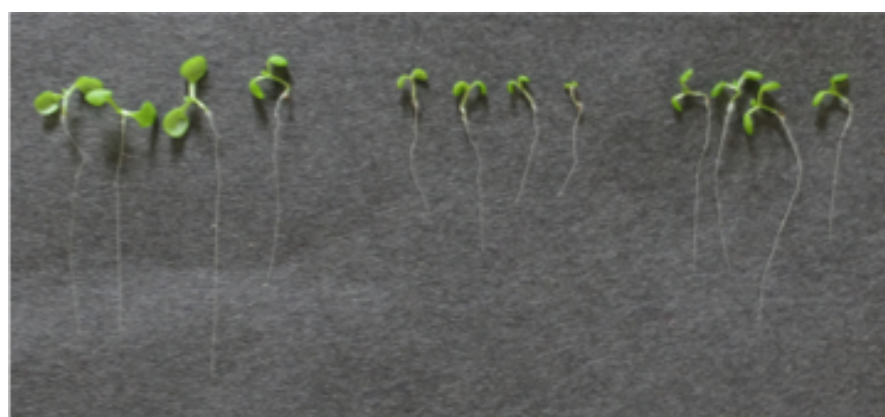

WT

#7

#13

B

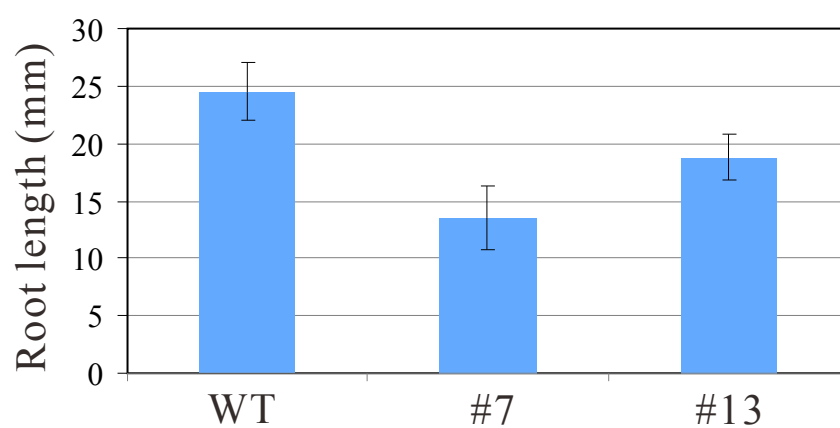

WT

#7

#13

C

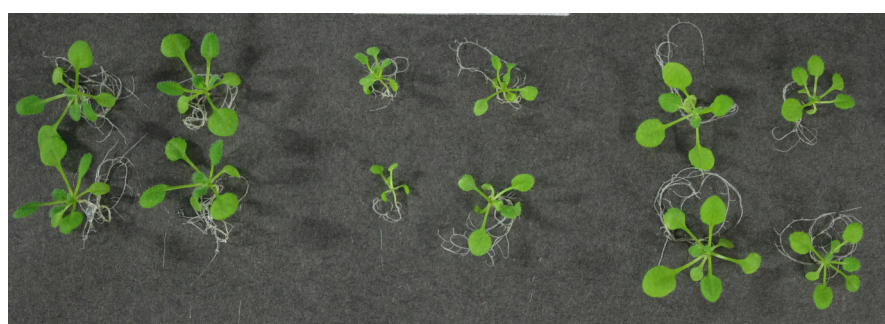

WT

#7

#13

D

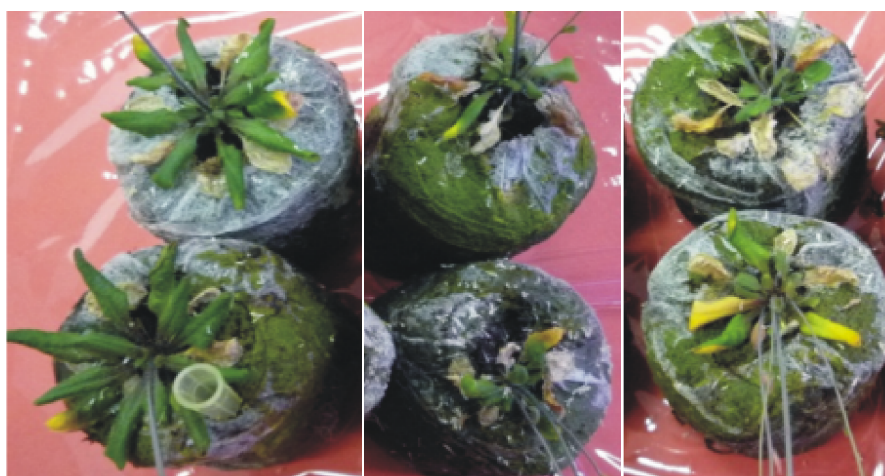

WT

#7

#13

Fig. S2 Nakai et al.

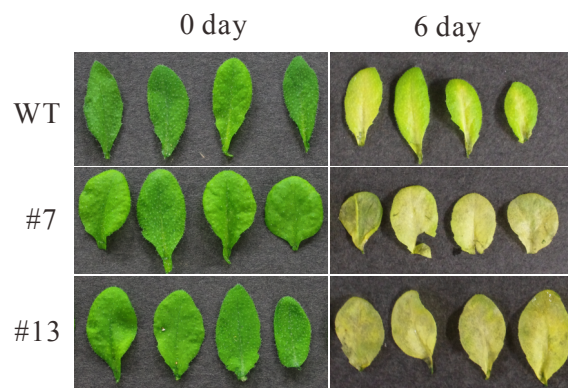

Fig. S3 Nakai et al.

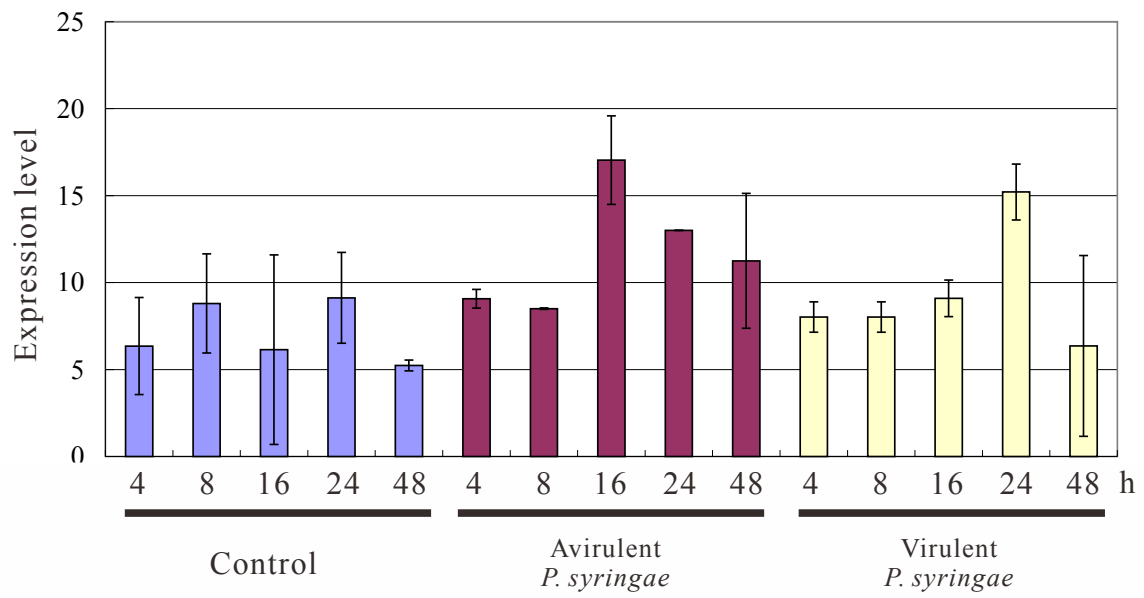

Fig. S4 Nakai et al.

Supplement: kpsb-10-03-990847-s003.pdf [file kpsb-10-03-990847-s003.pdf]
